# Supplementary material
Source: PubMed Central journal article supplement (PMC3754600)
Supplement: JB.00645-13_zjb999092762so1.pdf [file JB.00645-13_zjb999092762so1.pdf]

**Residue substitutions near the redox center of *Bacillus subtilis* Spx affect RNA polymerase interaction, redox control and Spx-DNA contact at a conserved cis-acting element.**

Ann A. Lin, Don Walthers, and Peter Zuber

**SUPPLEMENTAL MATERIAL**

**Figure S1. Effect of R92 substitutions in Spx on the transcription of *trxB-lacZ*.** Spx R92 residue was substituted with alanine(R92A), glutamine(R92Q), or lysine(R92K), and the resulting mutant alleles were introduced in the *amyE* locus and under IPTG control in *spx* null mutant strain bearing *trxB-lacZ*. Strains were grown in DS medium until the OD<sub>600</sub> reached 0.4. Then, each culture was divided into two flasks, and 1 mM IPTG was added to one flask to induce SpxDD expression. Samples were taken at time intervals and  $\beta$ -galactosidase activities were measured. Symbols: circles, SpxDD; diamonds, Spx(R92A)DD; squares, Spx(R92Q)DD; triangles, Spx(R92K)DD. Open symbols with broken lines represent cells cultured without IPTG, and closed symbols with solid lines represent cell culture with IPTG.

**Figure S2. Effect of Spx(G52R, R91A) mutant on *trxB-lacZ* transcription and RNAP binding.** The IPTG-inducible allele encoding Spx(G52R, R91A)DD was introduced into the *amyE* locus of the *Spx* null mutant

strain bearing *trxB-lacZ*. (A) The  $\beta$ -galactosidase assay was performed as described in Fig. 3 and the highest activities of Spx mutants were selected. The ratio of mutant activity to that of the control SpxDD was calculated. (B) The production of Spx protein in the strains was evaluated by Western blot analysis using anti-Spx antibody. (C, D) Purified Spx(G52R, R91A) $\Delta$ CHA protein was used for in vitro RNAP interaction assay. The SAd-RNAP or Holo-RNAP was incubated with Spx $\Delta$ CHA or Spx(G52R, R91A) $\Delta$ CHA and followed by the anti-HA affinity chromatography. The interaction between Spx proteins and SAd-RNAP (C)/Holo-RNAP (D) was analyzed by SDS-PAG gel. Abbreviation: I, input and E, eluate.

**Figure S3. Spx/RNAP/*trxB* crosslinking result at position -11, -21, -46, -49, -52 on *trxB* promoter.** Crosslinking reactions were performed as described in Experimental procedures. The nucleotide positions indicated here are crosslinking sites on the *trxB* promoter. Bands of crosslinked products on the gel corresponding to  $\beta\beta'$ ,  $\sigma^A$ ,  $\alpha$  and Spx are indicated. The band representing presumed uncleaved radiolabeled DNA substrate is also shown.

Table S1. *B. subtilis* strains and plasmids

| Strain or plasmid                 | Relevant genotype or characteristics                                                                                   | Source or reference |
|-----------------------------------|------------------------------------------------------------------------------------------------------------------------|---------------------|
| <b><i>B. subtilis</i> strains</b> |                                                                                                                        |                     |
| <b>JH642</b>                      | <i>trpC2 pheA1</i> (parental strain)                                                                                   | James Hoch          |
| <b>LAB545</b>                     | <i>trpC2 pheA1</i> SP $\beta$ <i>c2del2::Tn917::pMMN92(srfA-lacZ)</i>                                                  | (43)                |
| <b>ORB5853</b>                    | <i>trpC2 pheA1 sigA</i> (L366A) <i>neo rpoC-His<sub>10</sub> cat</i>                                                   | (42)                |
| <b>ORB6129</b>                    | <i>trpC2 pheA1</i> SP $\beta$ <i>c2del2::Tn917::pMMN92(srfA-lacZ)</i><br><i>amyE::pSN56(Pspankhy-spx<sup>DD</sup>)</i> | (32)                |
| <b>ORB7262</b>                    | <i>trpC2 pheA1 Δspx::neo thrC::pDYR9(trxB-lacZ)</i>                                                                    | (32)                |
| <b>ORB7276</b>                    | <i>trpC2 pheA1 Δspx::neo thrC::pDYR9(trxB-lacZ)</i><br><i>amyE::pSN56(Pspankhy-spx<sup>DD</sup>)</i>                   | (32)                |
| <b>ORB7282</b>                    | <i>trpC2 pheA1 Δspx::neo thrC::pDYR9(trxB-lacZ)</i><br><i>amyE::pMMN683(Pspankhy-spxR60E<sup>DD</sup>)</i>             | (32)                |
| <b>ORB7316</b>                    | <i>trpC2 pheA1 Δspx::neo thrC::pDYR9(trxB-lacZ)</i><br><i>amyE::pYZ14 (Pspankhy-spxC10A<sup>DD</sup>)</i>              | (32)                |
| <b>ORB7821</b>                    | <i>trpC2 pheA1 Δspx::neo thrC::pDYR9(trxB-lacZ)</i><br><i>amyE::pAL37(Pspankhy-spxR92A<sup>DD</sup>)</i>               | This study          |
| <b>ORB7822</b>                    | <i>trpC2 pheA1 Δspx::neo thrC::pDYR9(trxB-lacZ)</i><br><i>amyE::pAL38(Pspankhy-spxR92Q<sup>DD</sup>)</i>               | This study          |
| <b>ORB7904</b>                    | <i>trpC2 pheA1 Δspx::neo thrC::pDYR9(trxB-lacZ)</i><br><i>amyE::pAL56(Pspankhy-spxC10A,R92A<sup>DD</sup>)</i>          | This study          |
| <b>ORB7906</b>                    | <i>trpC2 pheA1 Δspx::neo thrC::pDYR9(trxB-lacZ)</i><br><i>amyE::pAL58(Pspankhy-spxR60E,R92A<sup>DD</sup>)</i>          | This study          |
| <b>ORB7945</b>                    | <i>trpC2 pheA1 Δspx::neo thrC::pDYR9(trxB-lacZ)</i><br><i>amyE::pAL64(Pspankhy-spxK62E,R92A<sup>DD</sup>)</i>          | This study          |
| <b>ORB7946</b>                    | <i>trpC2 pheA1 Δspx::neo thrC::pDYR9(trxB-lacZ)</i><br><i>amyE::pMMN684(Pspankhy-spxK62E<sup>DD</sup>)</i>             | This study          |
| <b>ORB7979</b>                    | <i>trpC2 pheA1 Δspx::neo thrC::pDYR9(trxB-lacZ)</i><br><i>amyE::pAL65(Pspankhy-spxC10A,R60E<sup>DD</sup>)</i>          | This study          |
| <b>ORB7981</b>                    | <i>trpC2 pheA1 Δspx::neo thrC::pDYR9(trxB-lacZ)</i><br><i>amyE::pAL67(Pspankhy-spxC10A,K62E<sup>DD</sup>)</i>          | This study          |
| <b>ORB8268</b>                    | <i>trpC2 pheA1 Δspx::neo thrC::pDYR9(trxB-lacZ)</i><br><i>amyE::pAL88(Pspankhy-spxR91A<sup>DD</sup>)</i>               | This study          |
| <b>ORB8269</b>                    | <i>trpC2 pheA1 Δspx::neo thrC::pDYR9(trxB-lacZ)</i><br><i>amyE::pAL93(Pspankhy-spxF64A<sup>DD</sup>)</i>               | This study          |
| <b>ORB8270</b>                    | <i>trpC2 pheA1 Δspx::neo thrC::pDYR9(trxB-lacZ)</i><br><i>amyE::pAL94(Pspankhy-spxF64Y<sup>DD</sup>)</i>               | This study          |
| <b>ORB8271</b>                    | <i>trpC2 pheA1 Δspx::neo thrC::pDYR9(trxB-lacZ)</i>                                                                    | This study          |

|                 |                                                                                                                             |            |
|-----------------|-----------------------------------------------------------------------------------------------------------------------------|------------|
| <b>ORB8272</b>  | <i>amyE</i> ::pAL95(Pspankhy-spxQ65A <sup>DD</sup> )<br><i>trpC2 pheA1 Δspx::neo thrC</i> ::pDYR9( <i>trxB-lacZ</i> )       | This study |
| <b>ORB8273</b>  | <i>amyE</i> ::pAL96(Pspankhy-spxN68A <sup>DD</sup> )<br><i>trpC2 pheA1 Δspx::neo thrC</i> ::pDYR9( <i>trxB-lacZ</i> )       | This study |
| <b>ORB8274</b>  | <i>amyE</i> ::pAL97(Pspankhy-spxN70A <sup>DD</sup> )<br><i>trpC2 pheA1 Δspx::neo thrC</i> ::pDYR9( <i>trxB-lacZ</i> )       | This study |
| <b>ORB8275</b>  | <i>amyE</i> ::pAL98 (Pspankhy-spxY5A <sup>DD</sup> )<br><i>trpC2 pheA1 Δspx::neo thrC</i> ::pDYR9( <i>trxB-lacZ</i> )       | This study |
| <b>ORB8309</b>  | <i>amyE</i> ::pAL99 (Pspankhy-spxY5F <sup>DD</sup> )<br><i>trpC2 pheA1 SPβc2del2::Tn917:: pMMN92(srfA-lacZ)</i>             | This study |
| <b>ORB8310</b>  | <i>amyE</i> ::pAL88(Pspankhy-spxR91A <sup>DD</sup> )<br><i>trpC2 pheA1 SPβc2del2::Tn917:: pMMN92(srfA-lacZ)</i>             | This study |
| <b>ORB8323</b>  | <i>amyE</i> ::pAL37(Pspankhy-spxR92A <sup>DD</sup> )<br><i>trpC2 pheA1 Δspx::neo thrC</i> ::pDYR9( <i>trxB-lacZ</i> )       | This study |
| <b>ORB8565</b>  | <i>amyE</i> ::pAL106(Pspankhy-spxR91A,R92A <sup>DD</sup> )<br><i>trpC2 pheA1 Δspx::neo thrC</i> ::pDYR9( <i>trxB-lacZ</i> ) | This study |
| <b>ORB8566</b>  | <i>amyE</i> ::pAL127(Pspankhy-spxR92K <sup>DD</sup> )<br><i>trpC2 pheA1 Δspx::neo thrC</i> ::pDYR9( <i>trxB-lacZ</i> )      | This study |
| <b>ORB8566</b>  | <i>amyE</i> ::pAL128(Pspankhy-spxG52R,R91A <sup>DD</sup> )                                                                  | This study |
| <b>Plasmids</b> |                                                                                                                             |            |
| <b>pAL37</b>    | pDR111 with <i>spxR92A<sup>DD</sup></i>                                                                                     | This study |
| <b>pAL38</b>    | pDR111 with <i>spxR92Q<sup>DD</sup></i>                                                                                     | This study |
| <b>pAL45</b>    | pDR111 with <i>spxΔCHA</i>                                                                                                  | (19)       |
| <b>pAL46</b>    | pTYB4 with <i>spxΔCHA</i>                                                                                                   | (19)       |
| <b>pAL54</b>    | pTYB4 with <i>spx<sup>R92A</sup></i>                                                                                        | This study |
| <b>pAL56</b>    | pDR111 with <i>spxC10A,R92A<sup>DD</sup></i>                                                                                | This study |
| <b>pAL58</b>    | pDR111 with <i>spxR60E,R92A<sup>DD</sup></i>                                                                                | This study |
| <b>pAL64</b>    | pDR111 with <i>spxK62E,R92A<sup>DD</sup></i>                                                                                | This study |
| <b>pAL65</b>    | pDR111 with <i>spxC10A,R60E<sup>DD</sup></i>                                                                                | This study |
| <b>pAL67</b>    | pDR111 with <i>spxC10A,K62E<sup>DD</sup></i>                                                                                | This study |
| <b>pAL73</b>    | pTYB4 with <i>spx<sup>C10A</sup>ΔCHA</i>                                                                                    | (19)       |
| <b>pAL74</b>    | pTYB4 with <i>spx<sup>G52R</sup>ΔCHA</i>                                                                                    | (19)       |
| <b>pAL75</b>    | pTYB4 with <i>spx<sup>R60E</sup>ΔCHA</i>                                                                                    | (19)       |
| <b>pAL82</b>    | pTYB4 with <i>spx<sup>R92A</sup>ΔCHA</i>                                                                                    | This study |
| <b>pAL88</b>    | pDR111 with <i>spxR91A<sup>DD</sup></i>                                                                                     | This study |
| <b>pAL93</b>    | pDR111 with <i>spxF64A<sup>DD</sup></i>                                                                                     | This study |
| <b>pAL94</b>    | pDR111 with <i>spxF64Y<sup>DD</sup></i>                                                                                     | This study |
| <b>pAL95</b>    | pDR111 with <i>spxQ65A<sup>DD</sup></i>                                                                                     | This study |
| <b>pAL96</b>    | pDR111 with <i>spxN68A<sup>DD</sup></i>                                                                                     | This study |
| <b>pAL97</b>    | pDR111 with <i>spxN70A<sup>DD</sup></i>                                                                                     | This study |
| <b>pAL98</b>    | pDR111 with <i>spxY5A<sup>DD</sup></i>                                                                                      | This study |
| <b>pAL99</b>    | pDR111 with <i>spxY5F<sup>DD</sup></i>                                                                                      | This study |
| <b>pAL106</b>   | pDR111 with <i>spxR91A,R92A<sup>DD</sup></i>                                                                                | This study |
| <b>pAL121</b>   | pTYB4 with <i>spx<sup>R91A</sup></i>                                                                                        | This study |
| <b>pAL122</b>   | pTYB4 with <i>spx<sup>R91A</sup>ΔCHA</i>                                                                                    | This study |
| <b>pAL127</b>   | pDR111 with <i>spxR92K<sup>DD</sup></i>                                                                                     | This study |
| <b>pAL128</b>   | pDR111 with <i>spxG52R,R91A<sup>DD</sup></i>                                                                                | This study |
| <b>pAL129</b>   | pTYB4 with <i>spx<sup>G52R,R91A</sup>ΔCHA</i>                                                                               | This study |
| <b>pDG793</b>   | <i>thrC</i> integration vector with promoter-less <i>lacZ</i> reporter                                                      | (49)       |
| <b>pDR111</b>   | <i>amyE</i> integration vector with Pspankhy promoter                                                                       | (38)       |
| <b>pDW4</b>     | TOPO vector with <i>trxB</i> promoter                                                                                       | This study |
| <b>pDW10</b>    | pRLG770 with <i>trxB</i> promoter                                                                                           | This study |
| <b>pDYR9</b>    | pDG793 with <i>trxB(-115~+47)-lacZ</i>                                                                                      | (22)       |
| <b>pMMN470</b>  | pTYB4 with <i>spx</i>                                                                                                       | (37)       |
| <b>pMMN683</b>  | pDR111 with <i>spxR60E<sup>DD</sup></i>                                                                                     | (32)       |
| <b>pMMN684</b>  | pDR111 with <i>spxK62E<sup>DD</sup></i>                                                                                     | (32)       |
| <b>pRLG770</b>  | transcription vector                                                                                                        | (44)       |
| <b>pSN56</b>    | pDR111 with <i>spx<sup>DD</sup></i>                                                                                         | (13)       |

---

|              |                                                     |                        |
|--------------|-----------------------------------------------------|------------------------|
| <b>pSN64</b> | pTYB4 with <i>sigA</i>                              | (21)                   |
| <b>pTYB4</b> | <i>E. coli</i> expression vector for IMPACT™ system | New England<br>BioRads |
| <b>pUC18</b> | cloning vector                                      |                        |
| <b>pUC19</b> | cloning vector                                      |                        |
| <b>pYZ14</b> | pDR111 with <i>spxC10A<sup>DD</sup></i>             | (50)                   |

---

Table S2. oligonucleotides used in this study

| <b>oligonucleotide</b> | <b>sequence</b>                                                                  | <b>purpose</b>                                     |
|------------------------|----------------------------------------------------------------------------------|----------------------------------------------------|
| oAL25                  | GATGATCGGAGCGCGAAGC                                                              | spx R92A reverse                                   |
| oAL24                  | GCTTCGCGCTCCGATCATC                                                              | spx R92A forward                                   |
| oAL27                  | GATGATCGGTTGGCGAAGC                                                              | spx R92Q reverse                                   |
| oAL26                  | GCTTCGCCAACCGATCATC                                                              | spx R92Q forward                                   |
| oAL62                  | ATCGGACGGGCAAGCAAACC                                                             | spx R91A reverse                                   |
| oAL61                  | GGTTTGCTTGCCCGTCCGAT                                                             | spx R91A forward                                   |
| oAL65                  | GTTCAAAAGTAGCTCAAAAAGTGA                                                         | spx F64A forward                                   |
| oAL66                  | TCAGTTTTTGAGCTACTTTTGAAC                                                         | spx F64A reverse                                   |
| oAL68                  | TCAGTTTTTGATATACTTTTGAAC                                                         | spx F64Y reverse                                   |
| oAL67                  | GTTCAAAAGTATATCAAAAAGTGA                                                         | spx F64Y forward                                   |
| oAL70                  | ACATTCAAGTTTAGCGAATACTTTTG                                                       | spx Q65A reverse                                   |
| oAL69                  | CAAAAGTATTTCGCTAAACTGAATGT                                                       | spx Q65A forward                                   |
| oAL72                  | ACGTTACAGCCAGTTTTTGT                                                             | spx N68A reverse                                   |
| oAL71                  | CAAAAAGTGGCTGTGAACGT                                                             | spx N68A forward                                   |
| oAL74                  | GATTCAACAGCCACATTCAG                                                             | spx N70A reverse                                   |
| oAL73                  | CTGAATGTGGCTGTTGAATC                                                             | spx N70A forward                                   |
| oAL76                  | GCTTGGTGATGTTGCTAGTGTA                                                           | spx Y5A reverse                                    |
| oAL75                  | TACACTAGCAACATCACCAAGC                                                           | spx Y5A forward                                    |
| oAL78                  | GCTTGGTGATGTAATAAGTGTA                                                           | spx Y5F reverse                                    |
| oAL77                  | TACACTATTTACATCACCAAGC                                                           | spx Y5F forward                                    |
| oAL88                  | GATCGGAGCGGCAAGCAAACC                                                            | spx R91A,R92A reverse                              |
| oAL87                  | GGTTTGCTTGCCGCTCCGATC                                                            | spx R91A,R92A forward                              |
| oLA106                 | ATGATGATCGGTTTGCAGCAAGCA                                                         | spx R92K reverse                                   |
| oAL105                 | TGCTTCGCAAACCGATCATCAT                                                           | spx R92K forward                                   |
| oDW7                   | GGAATTCATCTGTGACTCTATGAGCAATC                                                    | <i>trxB</i> (-200~+20) forward                     |
| oDW8                   | CAAGCTTCCCATCAAACGTATTCCTTAC                                                     | <i>trxB</i> (-200~+20) reverse                     |
| oAL35                  | TCCCCGGGAGCATAATCAGGAACATC                                                       | <i>HA</i> reverse (pTYB4)                          |
| oAL38                  | CTGAGGACCGAACAGATG                                                               | spx G52R forward                                   |
| oAL39                  | CATCTGTTCCGTCCTCAG                                                               | spx G52R reverse                                   |
| oDYR06-032             | TAAACCATCTTTAAGCTTTTGGGCTCTTTC                                                   | <i>trxB</i> (-115~+47) reverse                     |
| oDYR07-052             | GCGAATTCGGCCTTCTATAAACAGAAGGC                                                    | <i>trxB</i> (-115~+47) forward                     |
| oMMN01-135             | AGAGGAGTGAAGATCCATGGTTACTACTATAC                                                 | spx forward (pTYB4)                                |
| oMMN01-137             | TAACTCCCGGGGTTTGCCAAACGCTGTGCTT                                                  | spx reverse (pTYB4)                                |
| oMMN01-173             | CGAGGAAGCTTAGATGTTTCATCCTACTA                                                    | spx forward (pDR111)                               |
| oMMN01-174             | TACCAGCAGGTCGACAAATAAAAGAAGG                                                     | spx reverse (pDR111)                               |
| oSN03-66               | CACATACCAAGCGCGACTTCATGCAGAA                                                     | spx C10A forward                                   |
| oSN03-67               | TTCTGCATGAAGTCGCGCTTGGTGATGTG                                                    | spx C10A reverse                                   |
| oDYR06-02              | [Biotin]-CTGAACTAGAGGCCAAGGCTCTTTCTTTATTAACATATAC                                | <i>trxB</i> template (forward)<br>for crosslinking |
| oDYR06-03              | ATCCCCATCAAACGTATTCCCTTAC                                                        | <i>trxB</i> template (reverse)<br>for crosslinking |
| oDYR06-05              | ATCCCCATCAAACGTATTCCCTTACCCATATCC*T                                              | <i>trxB</i> -11 crosslinking<br>probe              |
| oDYR07-35              | ATCCCCATCAAACGTATTCCCTTACCCATATCCTATAAAAATCT*C                                   | <i>trxB</i> -21 crosslinking<br>probe              |
| oAL47                  | ATCCCCTCAAACGTATTCCCTTACCCATATCCTATAAAAATCTCATGGTGA<br>TACGCTA*T                 | <i>trxB</i> -36 crosslinking<br>probe              |
| oAL49                  | ATCCCCTCAAACGTATTCCCTTACCCATATCCTATAAAAATCTCATGGTGA<br>TACGCTATTTT*T             | <i>trxB</i> -40 crosslinking<br>probe              |
| oAL51                  | ATCCCCTCAAACGTATTCCCTTACCCATATCCTATAAAAATCTCATGGTGA<br>TACGCTATTTTTTTG*C         | <i>trxB</i> -44 crosslinking<br>probe              |
| oAL52                  | ATCCCCTCAAACGTATTCCCTTACCCATATCCTATAAAAATCTCATGGTGA<br>TACGCTATTTTTTTGCTCAA*C    | <i>trxB</i> -49 crosslinking<br>probe              |
| oDYR06-08              | ATCCCCTCAAACGTATTCCCTTACCCATATCCTATAAAAATCTCATGGTGA<br>TACGCTATTTTTTTGCT*C       | <i>trxB</i> -46 crosslinking<br>probe              |
| oDYR06-09              | ATCCCCTCAAACGTATTCCCTTACCCATATCCTATAAAAATCTCATGGTGA<br>TACGCTATTTTTTTGCTCAACAC*G | <i>trxB</i> -52 crosslinking<br>probe              |
