# Supplementary material
Source: PubMed Central journal article supplement (PMC3754600)

Fig. S1

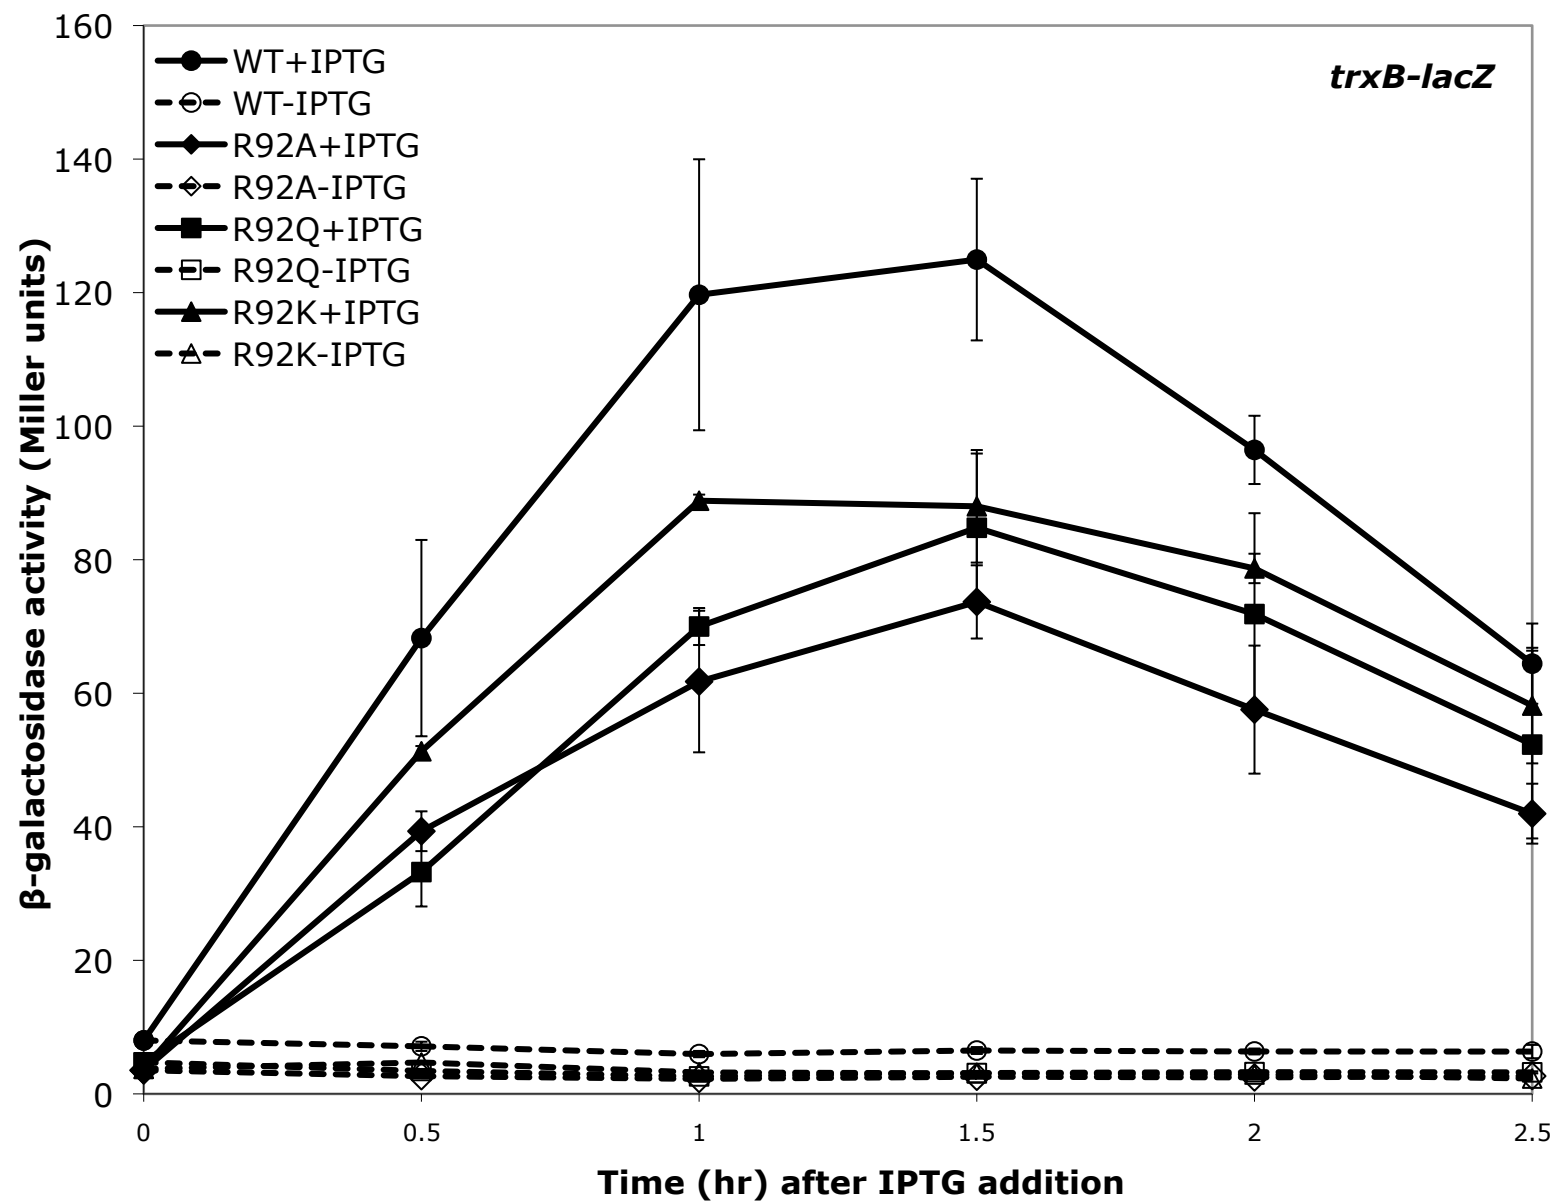

Fig. S2

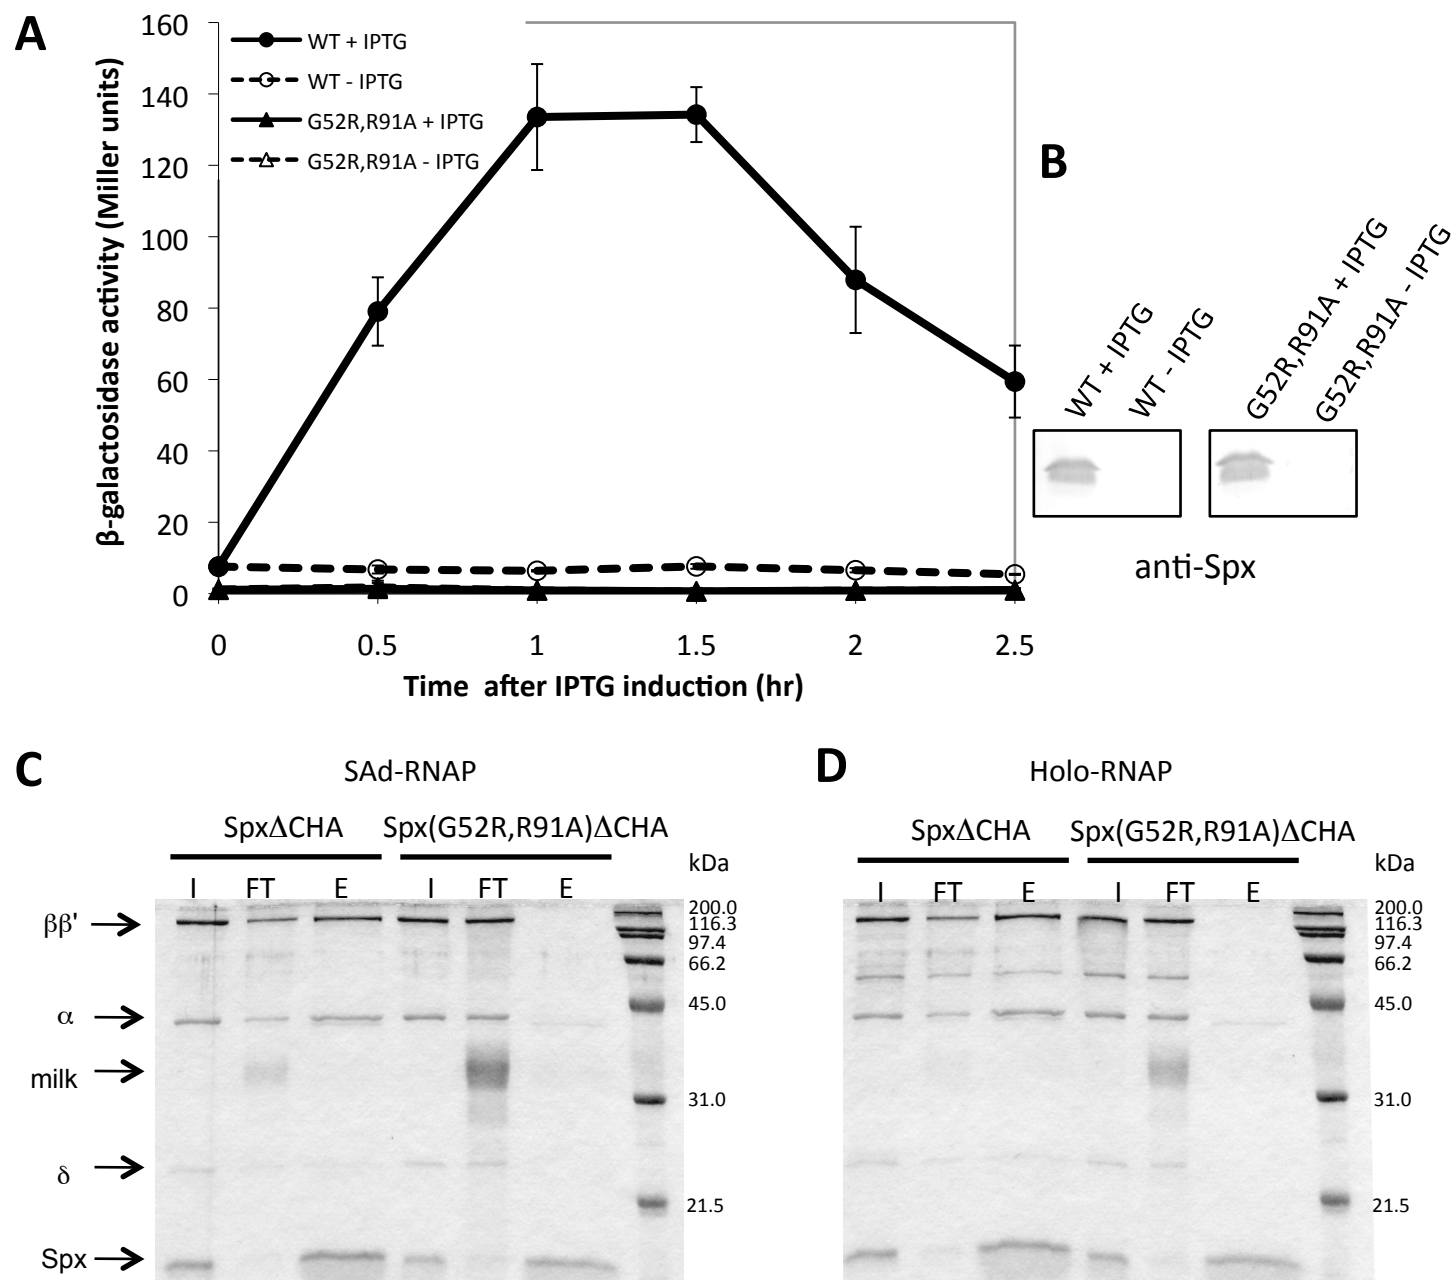

Fig. S3

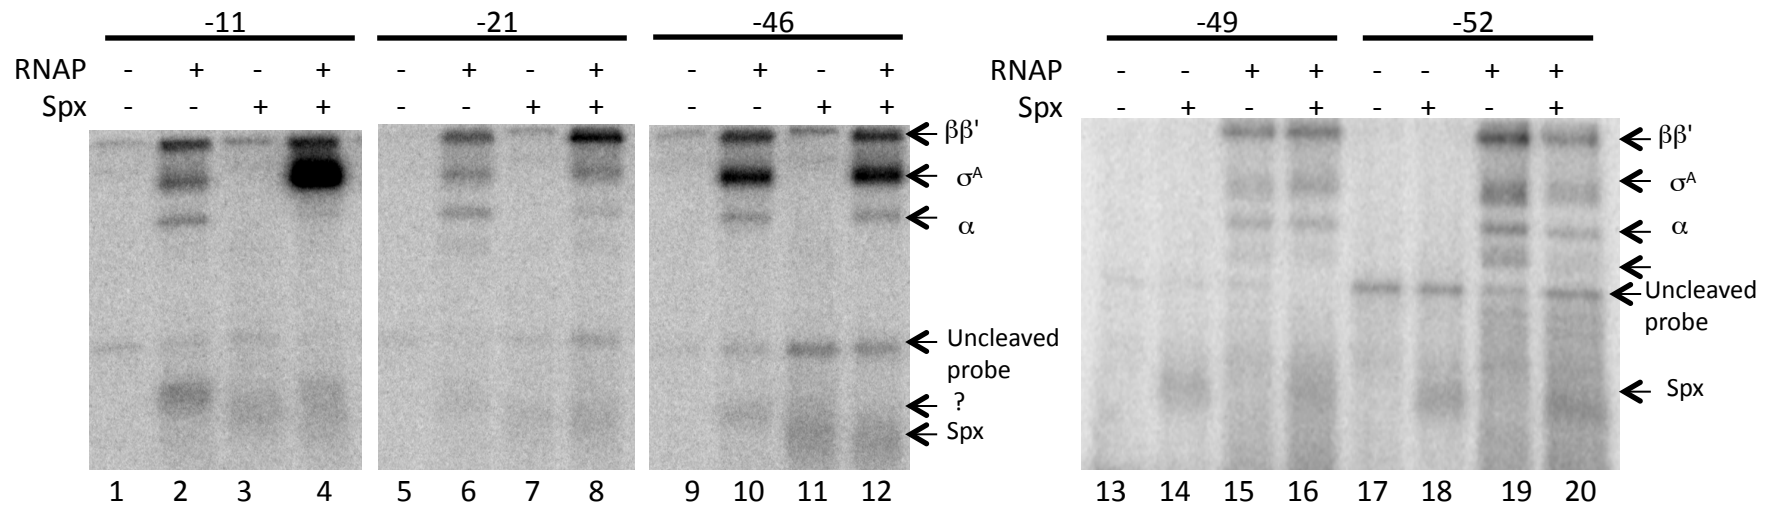

Supplement: JB.00645-13_zjb999092762so2.pdf [file JB.00645-13_zjb999092762so2.pdf]
